# Supplementary material
Source: PubMed Central journal article supplement (PMC3150480)

# Supplement Figure 1

## A

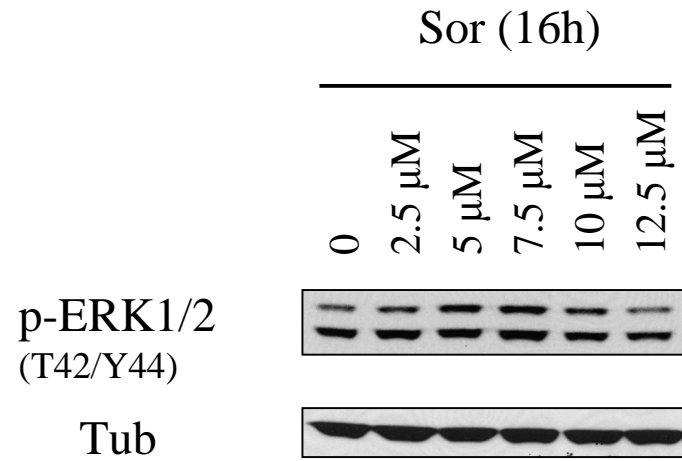

## B

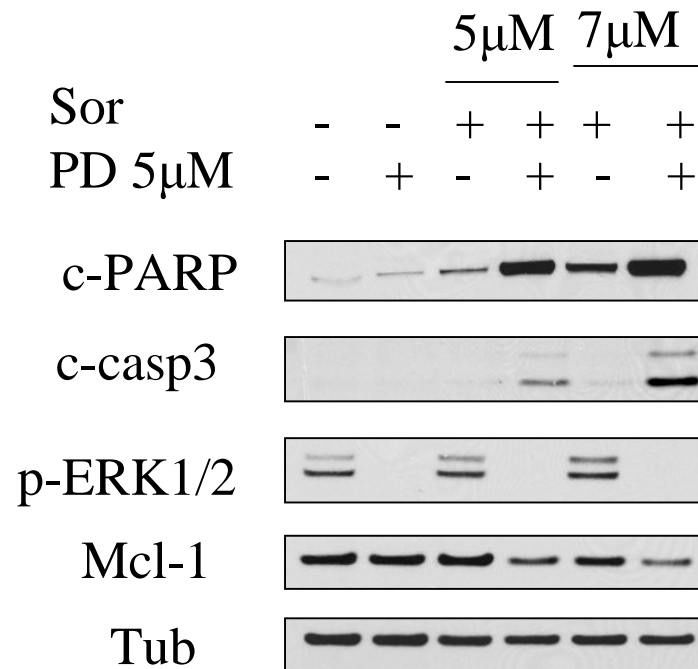

Supplement: NIHMS227117-supplement-02.pdf [file NIHMS227117-supplement-02.pdf]
